# Supplementary material
Source: PubMed Central journal article supplement (PMC11249315)
Supplement: NIHPP2023.11.03.565555V2-supplement-1.pdf [file NIHPP2023.11.03.565555V2-supplement-1.pdf]

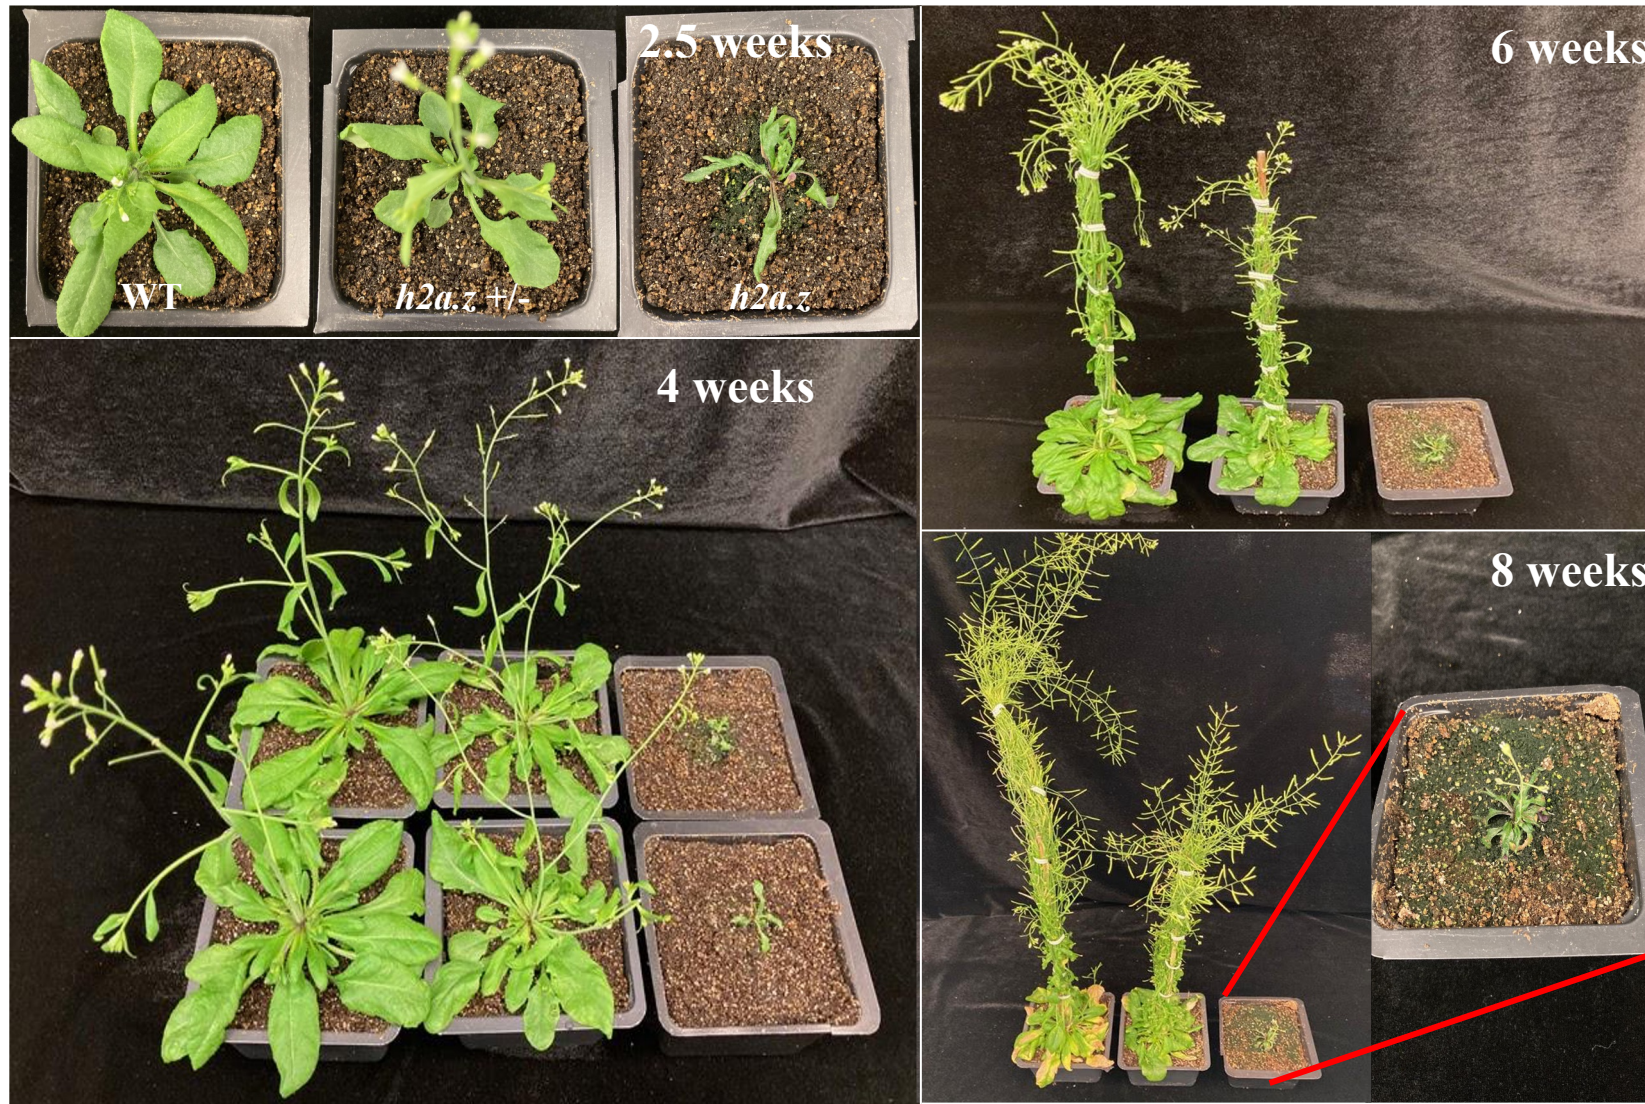

**S1 Figure. Complete loss-of-function *h2a.z* mutant plants have severe developmental defects.** WT (left), *h2a.z +/-* (middle), and *h2a.z* (right) plants, grown under long-day conditions, were individually photographed at four time points over eight weeks of growth. *h2a.z* mutant plants are dwarfed and have severely delayed development compared to *h2a.z +/-* and WT plants.

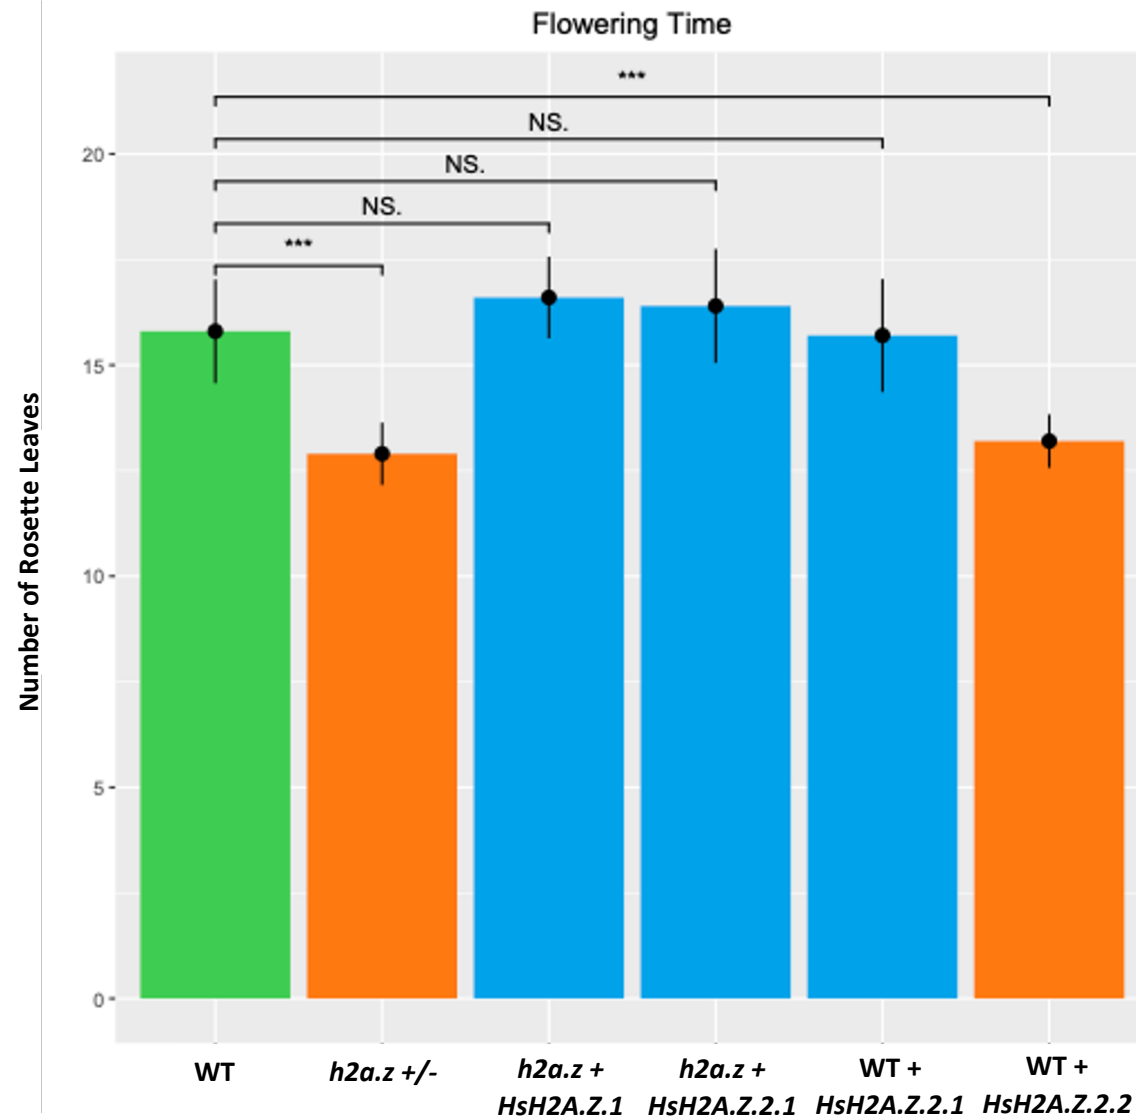

**S2 Figure.** The average number of rosette leaves of WT plants, *h2a.z +/-*, *h2a.z + HsH2A.Z.1*, *h2a.z + HsH2A.Z.2.1*, WT + *HsH2A.Z.2.1*, and WT + *HsH2A.Z.2.2* transgenic plants at flowering. Flowering time (assayed as the average number of rosette leaves from 10 different plants per genotype at the time of bolting) is significantly different between WT and *h2a.z +/-* (with p value=1.305e-05), as well as between WT and WT + *HsH2A.Z.2.2* plants (with p value=4.204e-05). T-test was used for statistical analysis.

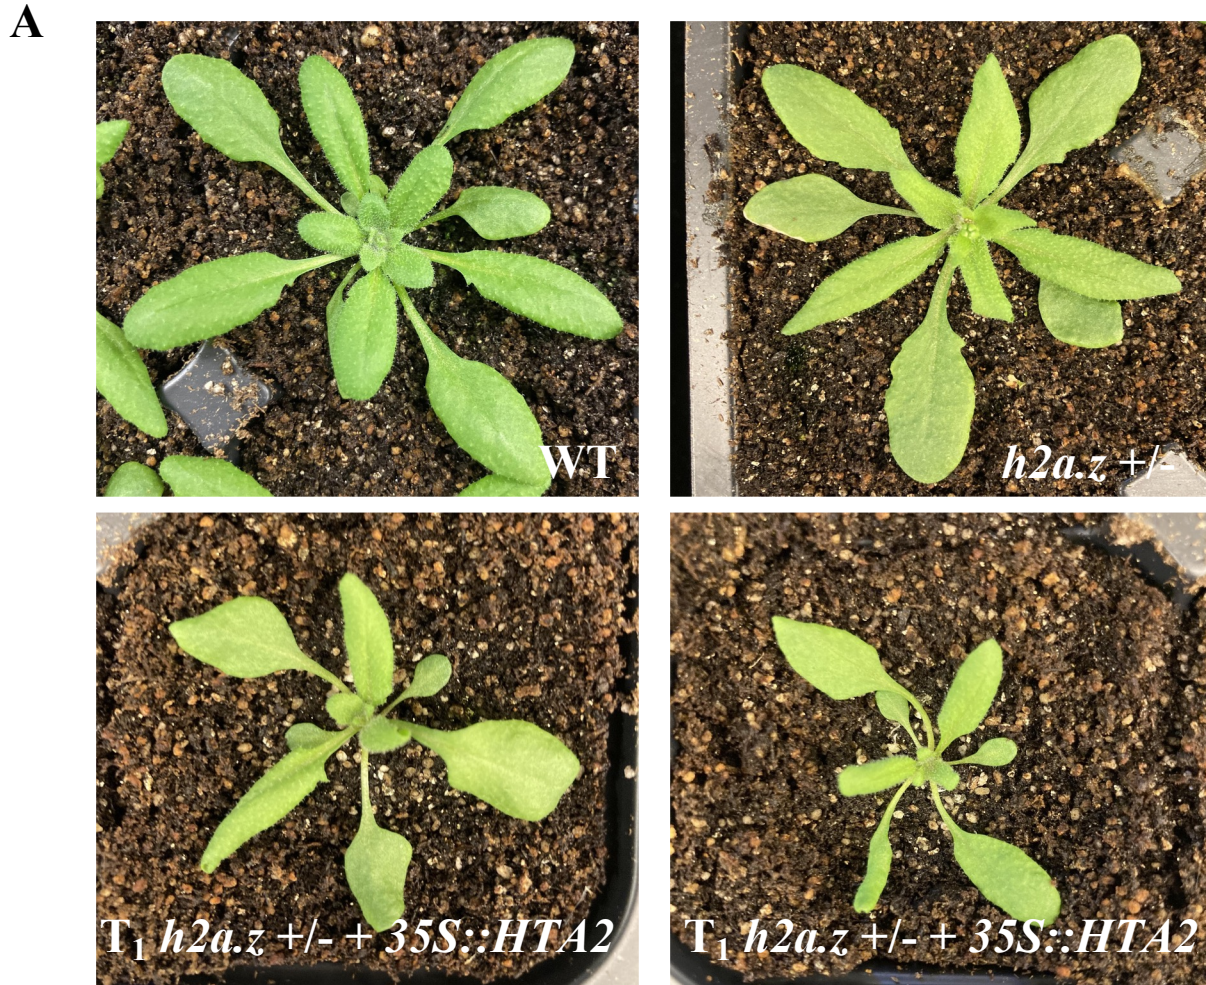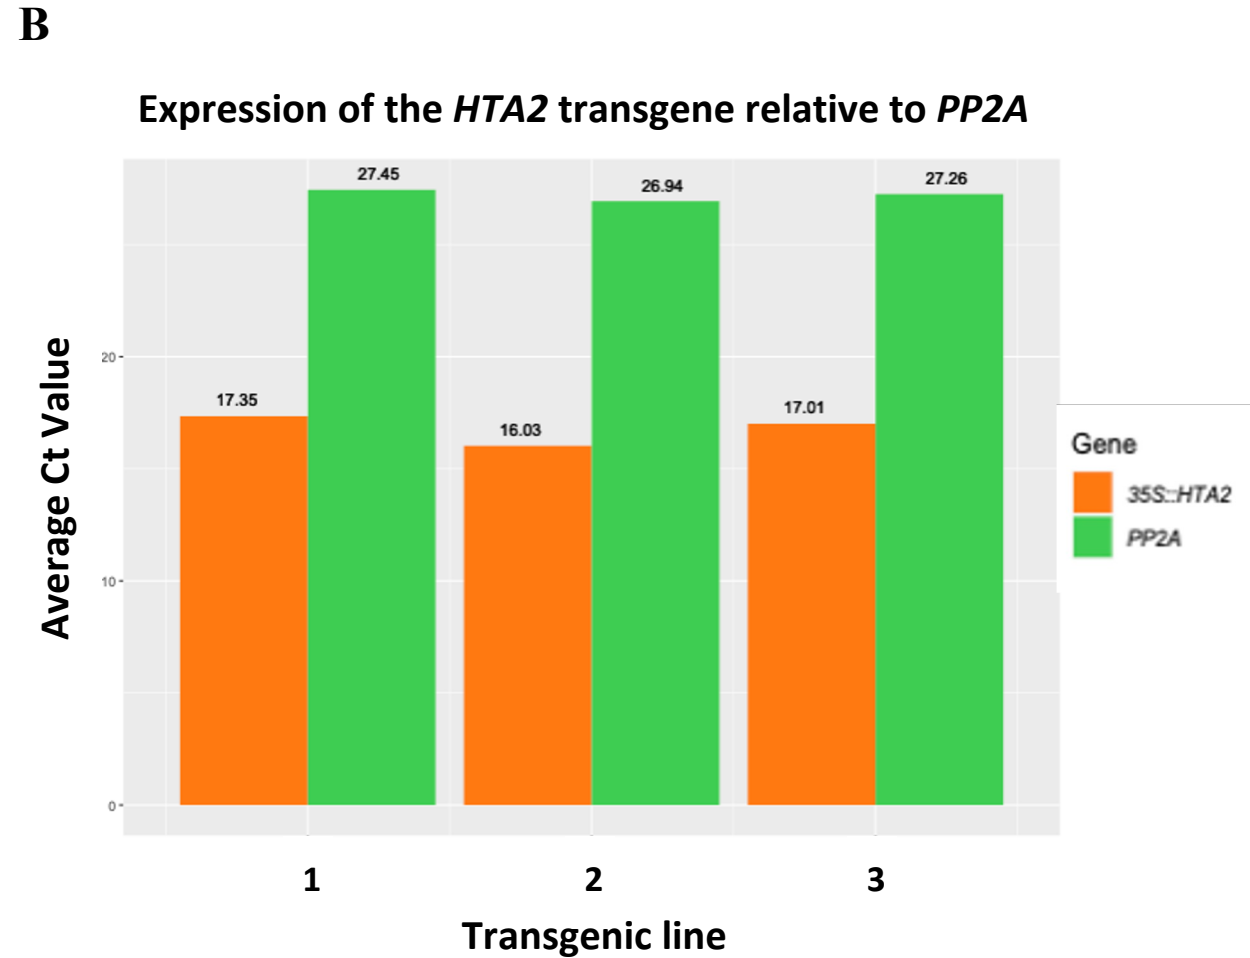

**S3 Figure. Overexpression of Arabidopsis canonical H2A histone HTA2 does not rescue *h2a.z +/-* phenotypic defects.** (A) Two week old plants were grown under long-day conditions and individually photographed. (B) The cycle threshold (Ct) values of RT-qPCR assays of the *HTA2* transgene (orange bars) in three individual  $T_1$  plants (three biological replicates) relative to the Ct values of the endogenous control gene *PP2A* (green bars), as measured by RT-qPCR. Each biological replicate/transgenic plant had two technical RT-qPCR replicates.

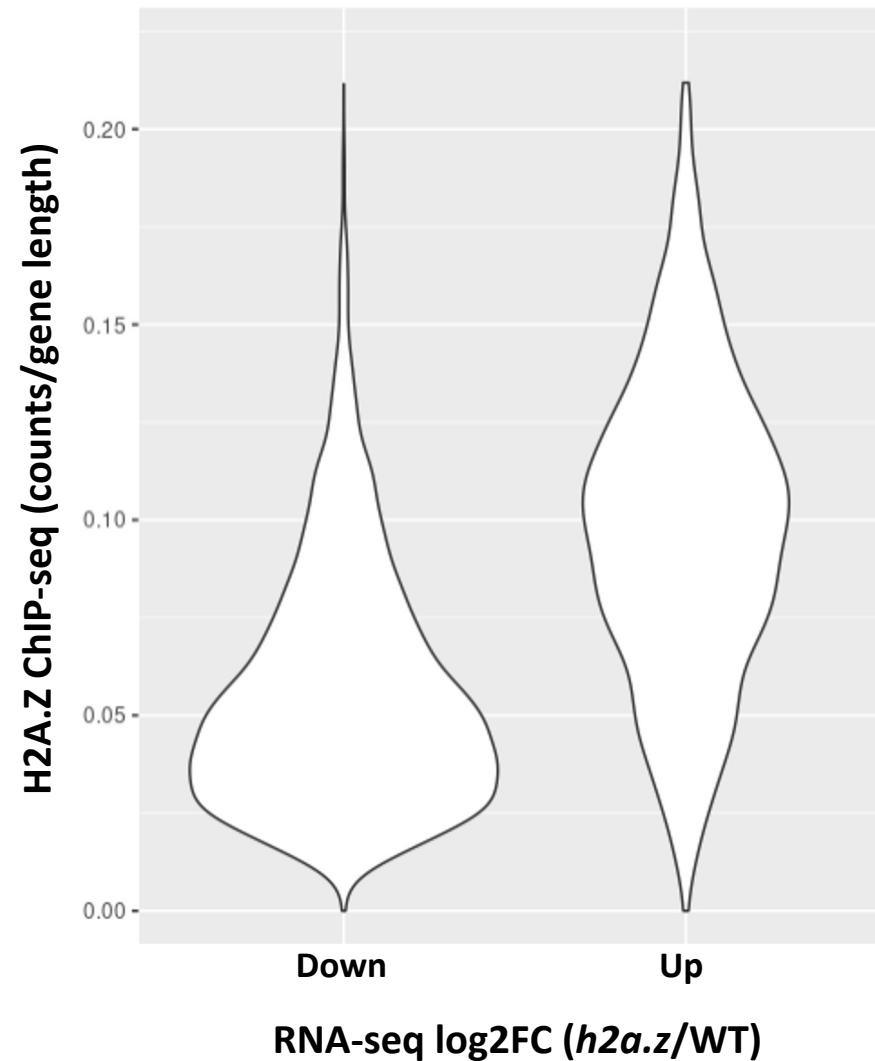

**S4 Figure. WT H2A.Z levels are higher at upregulated genes vs downregulated genes.** Violin plots showing average H2A.Z enrichment in WT across the bodies of genes either downregulated ( $n = 3714$ ) or upregulated ( $n = 4685$ ) in *h2a.z* plants. Counts are averaged over 3 DESeq2 normalized ChIP-seq replicates and corrected for gene length. Down and Up genes are defined as  $|L2FC| > 0.6$  and  $\text{padj} < 0.05$  with outliers excluded from each group.

A

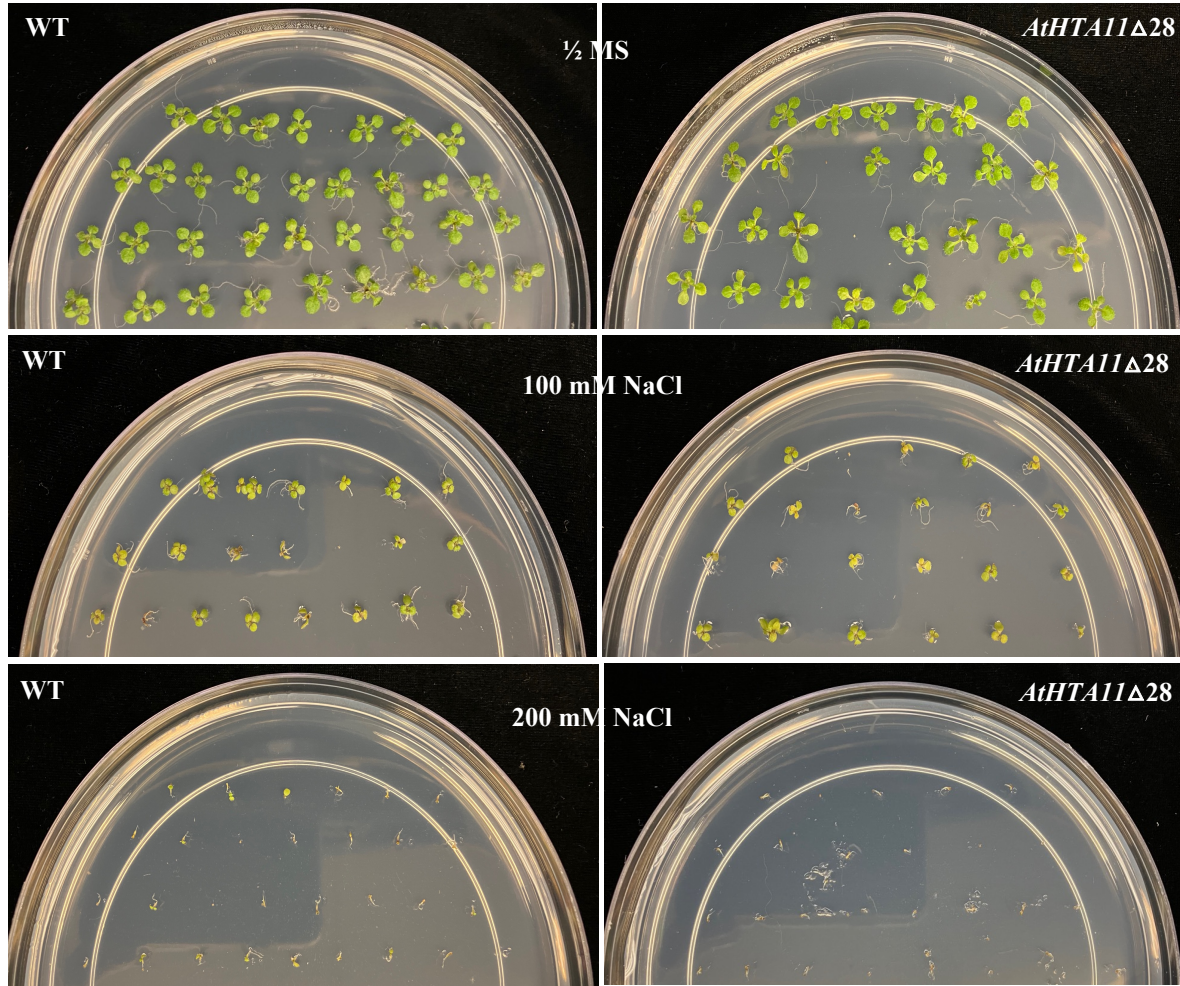

B

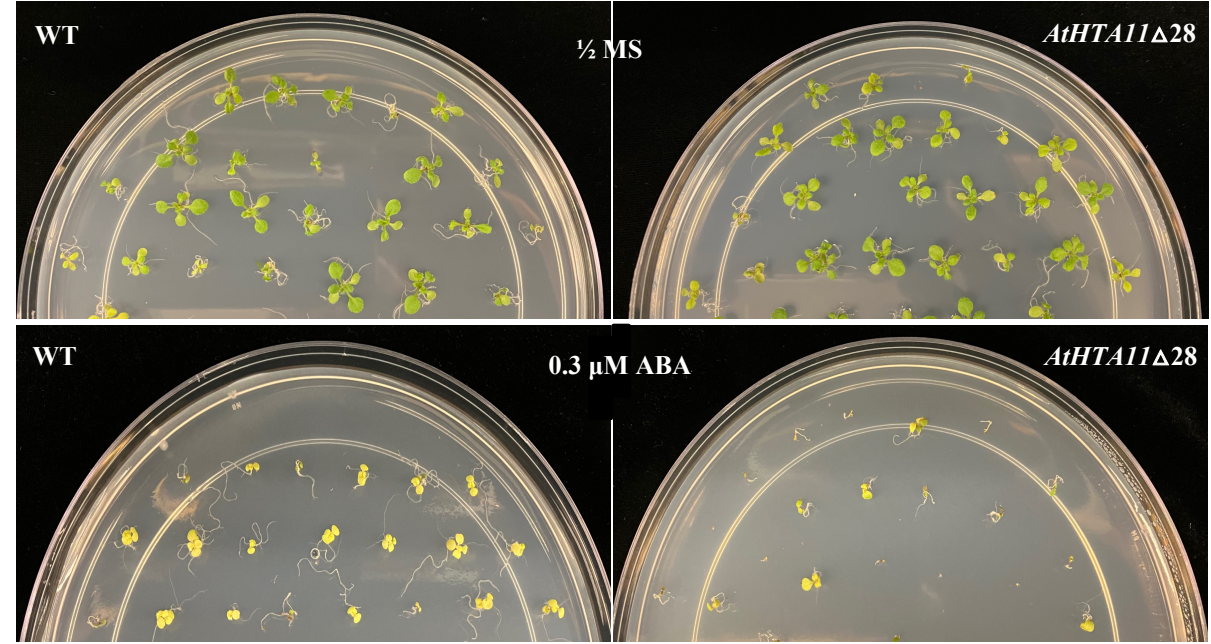

**S5 Figure. *AtHTA11Δ28* plants are more sensitive to high salt and ABA stresses than WT plants.** Eleven-day-old seedlings grown on 1/2 MS agar plates or plates supplemented with either 100 mM or 200 mM NaCl (A) or supplemented with 0.3 μM Abscisic acid (ABA) (B), were photographed and characterized for their ability to germinate and to produce green tissue. Each experiment was performed in duplicate and representative plates are shown here.

**A**

|       |                                                                                |     |
|-------|--------------------------------------------------------------------------------|-----|
| HTA11 | MAGKGGKGLVAAKTMAANKDKDKDKKKKPI SR SARAGIQFPVGR IHRQLKTRVSAHGRVGA               | 60  |
| HTA2  | MAGR GKQ-----LGSGAAKKSTSRSSKAGLQFPVGR IARFLKAGK-YAERVGA                        | 47  |
|       | ***:* : . ** *::*:***** * *: *****                                             |     |
|       |                                                                                |     |
| HTA11 | TAAVYTASILEYLTAEVLELAGNAS <b>KDL</b> KVKRITPRHLQLAIR <b>GDEELDTLIK</b> -GTIAGG | 119 |
| HTA2  | GAPVYLAAVLEYLAAEVLELAGNAARDNKKTRIVPRHIQLAVRNDDEELSKLLGDVVTIANG                 | 107 |
|       | * ** *::*:*****:*** * * .**.*::*:**:*.******.*: ***.*                          |     |
|       |                                                                                |     |
| HTA11 | GVIP <b>HI</b> HKSLINK <b>TTKE</b> ----- 136                                   |     |
| HTA2  | GVMPNIHNL L L P K KAGSSKPT EED 131                                             |     |
|       | **:*::*: * : * . : .                                                           |     |

**B**

|           |                                                                                  |     |
|-----------|----------------------------------------------------------------------------------|-----|
| H2A.Z.2.2 | -----MAGG--KAGKDSGKAKAKAVSR SQRAGLQFPVGR IHRHLKTRTTSHGRVGA                       | 49  |
| H2A.Z.1   | -----MAGG--KAGKDSGKAKTKAVSR SQRAGLQFPVGR IHRHLKSRTTSHGRVGA                       | 49  |
| H2A.Z.2.1 | -----MAGG--KAGKDSGKAKAKAVSR SQRAGLQFPVGR IHRHLKTRTTSHGRVGA                       | 49  |
| HTA9      | MSGKGAKGLIMGKPSG--SDKDKDKKPI TRSSRAGLQFPVGR VHRLLKTRSTAHGRVGA                    | 58  |
| HTA8      | MAGKGGKGLLAAKTTAAAANKDSVKKKSI SRSSRAGIQFPVGR IHRQLKQVSAHGRVGA                    | 60  |
| HTA11     | MAGKGGKGLVAAKTMAANKDKDKDKKKKPI SR SARAGIQFPVGR IHRQLKTRVSAHGRVGA                 | 60  |
|           | : . :... * * ::* **:******:* * * * ::*****                                       |     |
|           |                                                                                  |     |
| H2A.Z.2.2 | TAAVYSA A ILEYLTAEVLELAGNAS <b>KDL</b> KVKRITPRHLQLAIR <b>GDEELDSLKA</b> -TIAGGE | 108 |
| H2A.Z.1   | TAAVYSA A ILEYLTAEVLELAGNAS <b>KDL</b> KVKRITPRHLQLAIR <b>GDEELDSL</b> IKATIAGGG | 109 |
| H2A.Z.2.1 | TAAVYSA A ILEYLTAEVLELAGNAS <b>KDL</b> KVKRITPRHLQLAIR <b>GDEELDSL</b> IKATIAGGG | 109 |
| HTA9      | TAAVYTA A ILEYLTAEVLELAGNAS <b>KDL</b> KVKRISPRHLQLAIR <b>GDEELDTLIK</b> GTIAGGG | 118 |
| HTA8      | TAAVYTASILEYLTAEVLELAGNAS <b>KDL</b> KVKRITPRHLQLAIR <b>GDEELDTLIK</b> GTIAGGG   | 120 |
| HTA11     | TAAVYTASILEYLTAEVLELAGNAS <b>KDL</b> KVKRITPRHLQLAIR <b>GDEELDTLIK</b> GTIAGGG   | 120 |
|           | *****:*:*****:*****:*****:* *****                                                |     |
|           |                                                                                  |     |
| H2A.Z.2.2 | KRRCS----- 113                                                                   |     |
| H2A.Z.1   | VIP <b>HI</b> HKSLIG <b>KKGQ</b> QKTV 128                                        |     |
| H2A.Z.2.1 | VIP <b>HI</b> HKSLIG <b>KKGQ</b> QKTA 128                                        |     |
| HTA9      | VIP <b>HI</b> HKSLINK <b>SAKE</b> --- 134                                        |     |
| HTA8      | VIP <b>HI</b> HKSLVN <b>KVTKD</b> --- 136                                        |     |
| HTA11     | VIP <b>HI</b> HKSLINK <b>TTKE</b> --- 136                                        |     |

**S6 Figure. Conserved amino acids that contribute to H2A.Z unique function are found in both human and Arabidopsis H2A.Zs but not in Arabidopsis histone H2A. (A)** Clustal Omega alignment between Arabidopsis HTA11 (H2A.Z) and HTA2 (core H2A) histones. Amino acids that are important for H2A.Z identity are highlighted in bold within the AtHTA11 sequence and amino acids exclusively found in AtHTA11 are highlighted in bold red and are not present in HTA2. **(B)** Clustal Omega alignment between human and Arabidopsis H2A.Zs. Amino acids that contribute to unique H2A.Z functions are highlighted in bold and are found in all Arabidopsis H2A.Zs and human H2A.Z.1 and H2A.Z.2.1, while in human H2A.Z.2.2. several key conserved residues at the C-terminal end are missing.

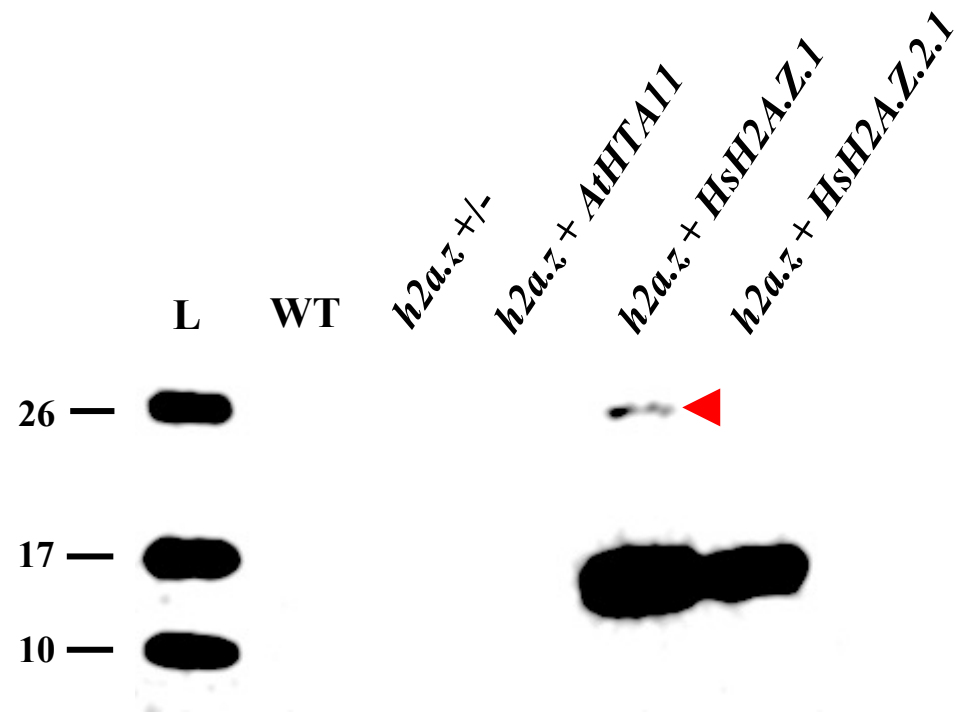

**S7 Figure. Human HsH2A.Z.1 appears to be monoubiquitinated when expressed in plants.** The same western blot as shown in Figure 2C (middle panel, probed with an antibody against human H2A.Z) but overexposed, with the red arrowhead denoting the likely monoubiquitinated form of human HsH2A.Z.1 detected in the *h2a.z* + *HsH2A.Z.1* transgenic plants.

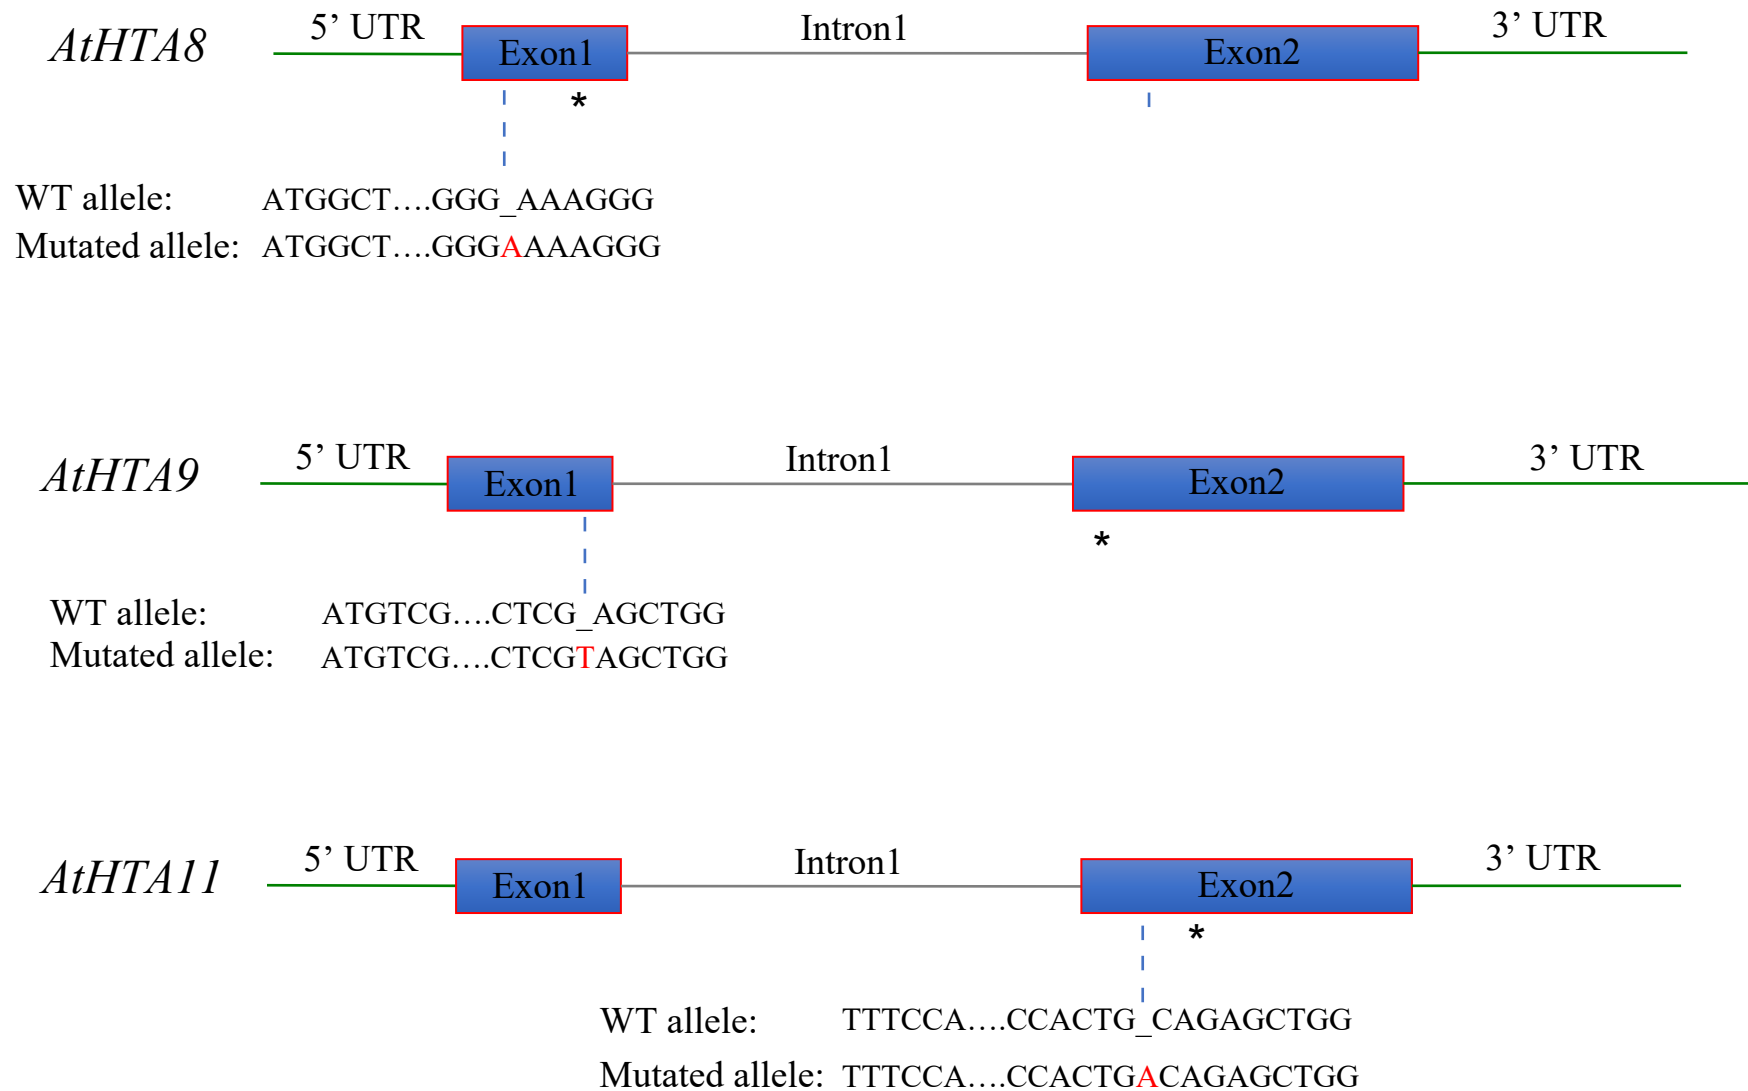

**S8 Figure. Graphical representation of Arabidopsis *h2a.z* CRISPR mutant alleles.** For each H2A.Z gene the location and the type of CRISPR mutation is shown. All three genes have an addition of a single base pair causing a frame shift that leads to a premature stop codon (marked with an asterisk).
